# Supplementary material for: A novel Carcinoembryonic Antigen (CEA)-Targeted Trimeric Immunotoxin shows significantly enhanced Antitumor Activity in Human Colorectal Cancer Xenografts
Source: PubMed Central journal article supplement (PMC6690998; doi:10.1038/s41598-019-48285-z), 2019-08-12
Supplement: 41598_2019_48285_MOESM1_ESM.pdf [file 41598_2019_48285_MOESM1_ESM.pdf]

**A novel Carcinoembryonic Antigen (CEA)-Targeted Trimeric Immunotoxin shows significantly enhanced Antitumor Activity in Human Colorectal Cancer Xenografts**

Lázaro-Gorines, R.

Ruiz-de-la-Herrán, J.

Navarro, R.

Sanz, L.

Álvarez-Vallina, L.

Martínez-del-Pozo, A.

Gavilanes, JG.Lacadena, J.

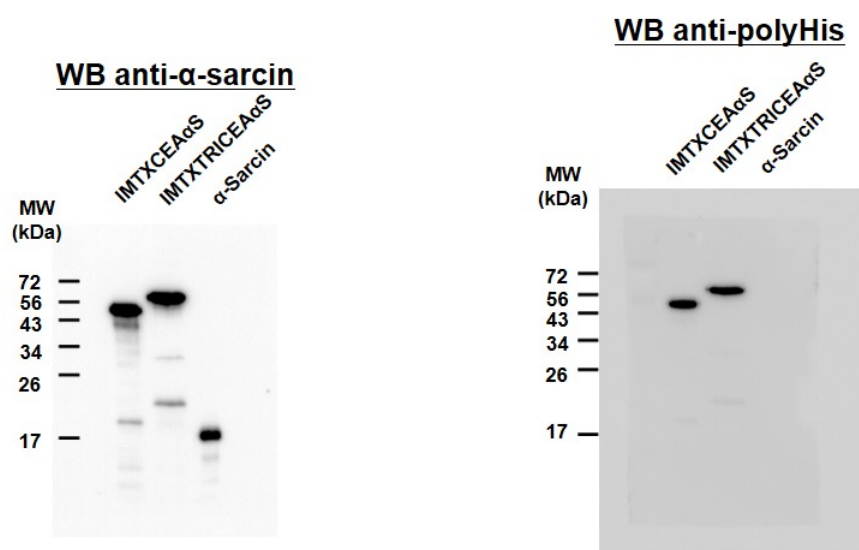

Figure S1

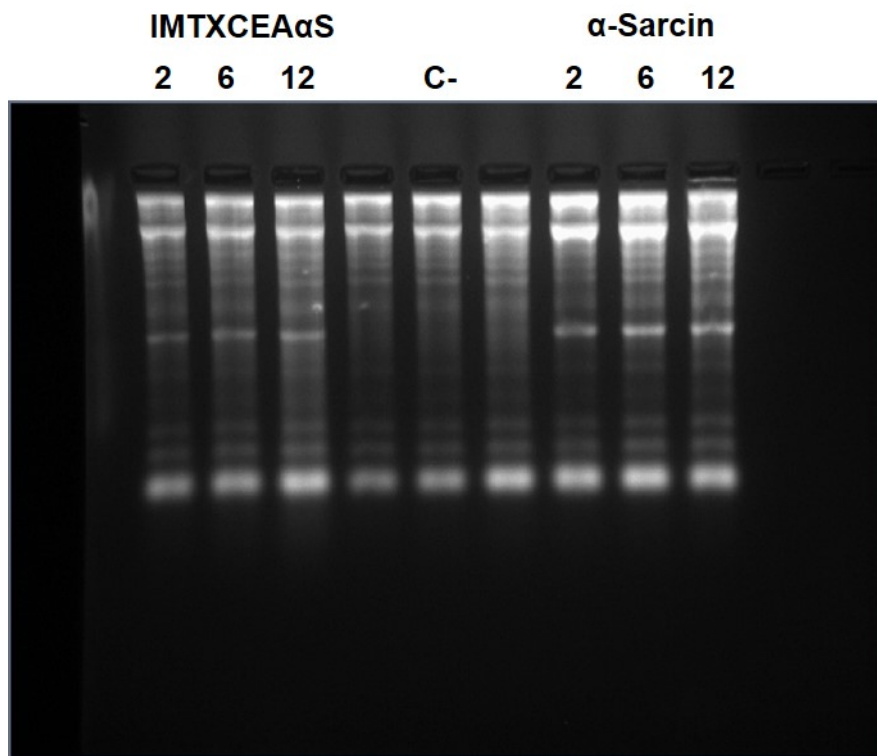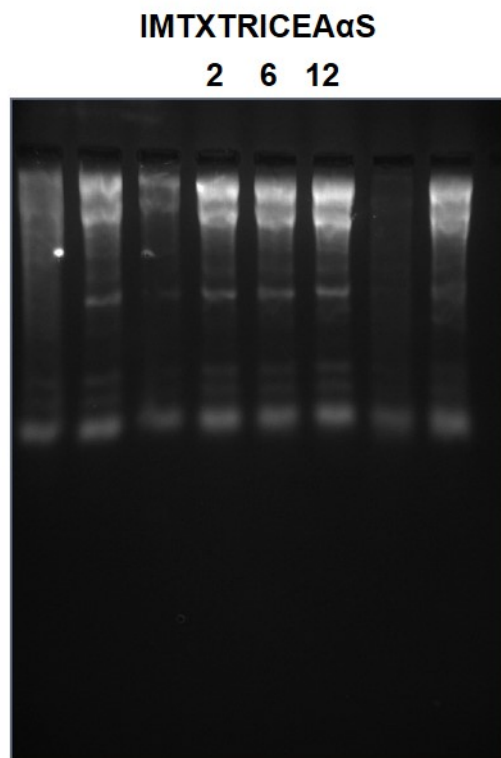

Figure S2

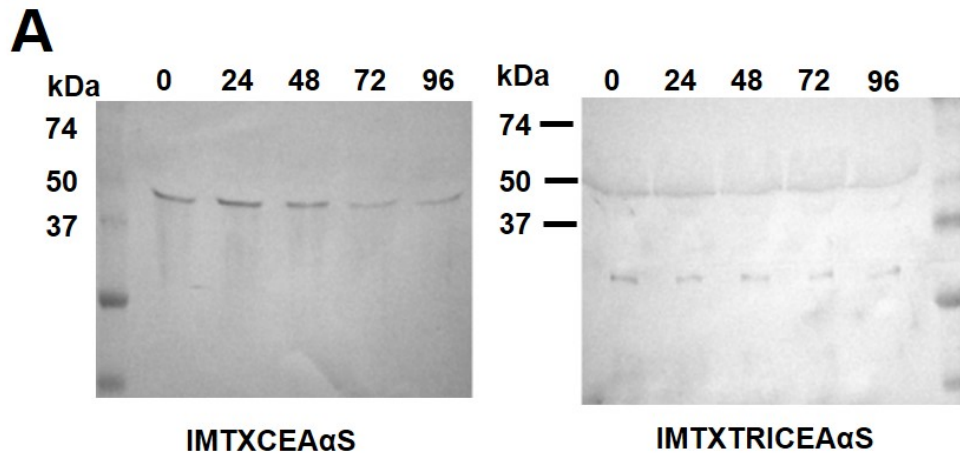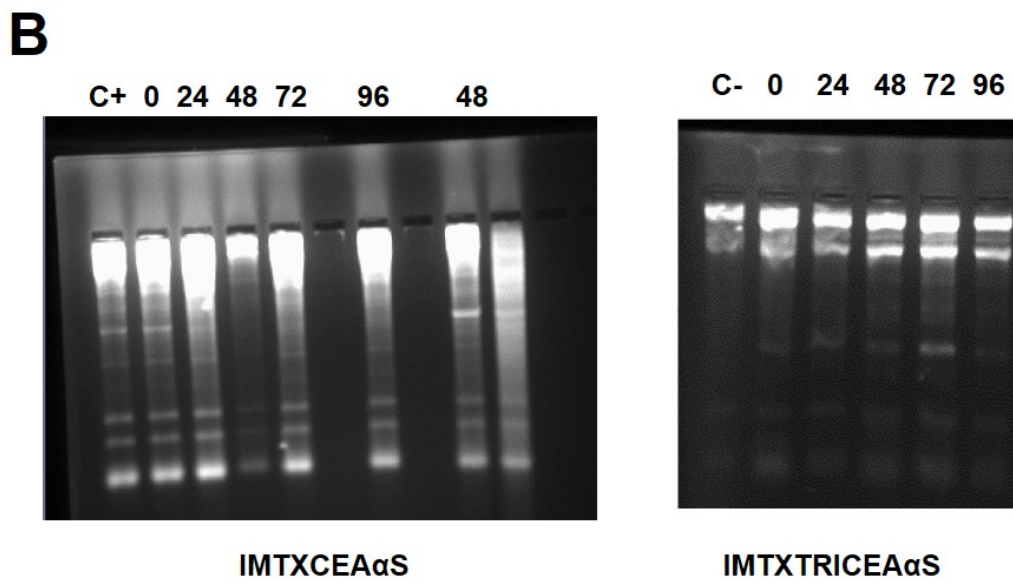

Figure S3

## Supplementary Figures Legends

**Figure-S1. SDS-PAGE and Western Blot analysis of both purified immunotoxins.** A) Western blot analysis using rabbit anti- $\alpha$ -sarcin serum (left) or commercial anti-histidine tag antibody (right).  $\alpha$ -Sarcin designates 0.1  $\mu$ g of the fungal natural protein used as a control. MW corresponds to prestained BioRad Precision Plus protein molecular weight standards. Images correspond to full-length gels and blots acquired and analyzed using the Gel Doc XR Imaging System and Quantity One 1-D analysis software (BioRad) or ChemiDoc-It (UVP) and VisionWorks LS, respectively. In this figure different exposure of the blots presented in Figure 2 are shown.

**Figure-S2. *In vitro* functional characterization.** Ribonucleolytic activity of the toxic domain: Rabbit reticulocytes assays were made in order to test the ribonucleolytic activity of  $\alpha$ -sarcin within both constructs. Original full-length gels from Figure 4D are presented. The gels show the release of  $\alpha$ -fragment, highlighted by a black arrow, produced by the specific SRL cleavage. In this original full-length gels, 2, 6 and 12 pmol were assayed for both immunotoxins and fungal wild-type  $\alpha$ -sarcin. C, negative control where the protein sample was replaced by buffer. Gel images were acquired and analyzed using the Gel Doc XR Imaging System and Quantity One 1-D analysis software (BioRad).

**Figure-S3. Immunotoxin stability at physiological conditions.** Different aliquots of IMTXCEA $\alpha$ S and IMTXTRICEA $\alpha$ S were incubated with FBS at 37°C for up to 96 hours. Aliquots were taken every 24 h and analyzed. A) Western blot analysis using an anti- $\alpha$ -sarcin antisera. Full-length blots from Figure 5A are displayed. Blot images were acquired and analyzed using the ChemiDoc-It (UVP) and VisionWorks LS B) Ribonucleolytic activity assays. IMTXCEA $\alpha$ S and IMTXTRICEA $\alpha$ S original full-length gels from Figure 5B are displayed. Gel image was acquired and analyzed using the Gel Doc XR Imaging System and Quantity One 1-D analysis software (BioRad).
